# Supplementary material for: Enhanced Molecularly Imprinted Fluorescent Test Strip for Rapid and Visual Detection of Norfloxacin via a Smartphone
Source: MDPI journal article supplement (doi:10.3390/molecules29030661), 2024-01-31
Supplement: s1 [file s1]

## Supplementary Materials

### Enhanced molecularly imprinted fluorescent test strip for rapid and visual detection of Norfloxacin via a smartphone

Bo Hu <sup>1</sup>, Wenshi Zhao <sup>3</sup>, Li Chen <sup>2</sup>, Yang Liu <sup>3</sup>, Zhongfei Ma <sup>1</sup>, Yongsheng Yan <sup>2</sup> and Minjia Meng <sup>2,\*</sup>

<sup>1</sup> School of Environment and Safety Engineering, Jiangsu University, Zhenjiang 212013, China  
2111809001@stmail.ujs.edu.cn (B.H.); mzf@ujs.edu.cn (Z.M.)

<sup>2</sup> School of Chemistry and Chemical Engineering, Jiangsu University, Zhenjiang 212013, China  
lchen@ujs.edu.cn (L.C.) yys@mail.ujs.edu.cn (Y.Y.)

<sup>3</sup> Key Laboratory of Functional Materials Physics and Chemistry of the Ministry of Education, Jilin Normal University, Changchun 130103, China  
zws6979@163.com (W.Z.); liuyang@jlnu.edu.cn (Y.L.)

\* Correspondence: mmj@ujs.edu.cn

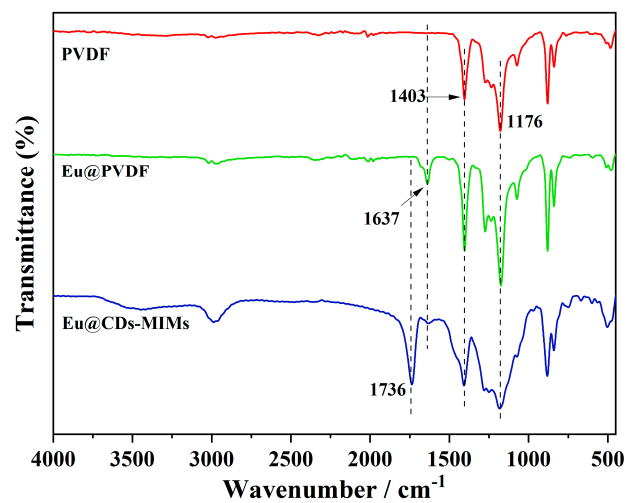

**Figure. S1.** FT-IR spectra of PVDF, Eu@PVDF, and Eu@CDs-MIMs.

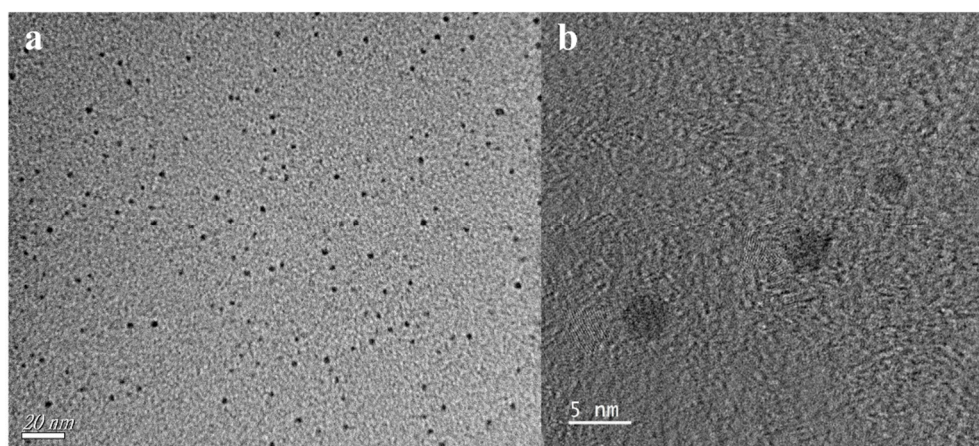

**Figure. S2.** TEM image of CDs (a) and HR-TEM image of CDs (b).

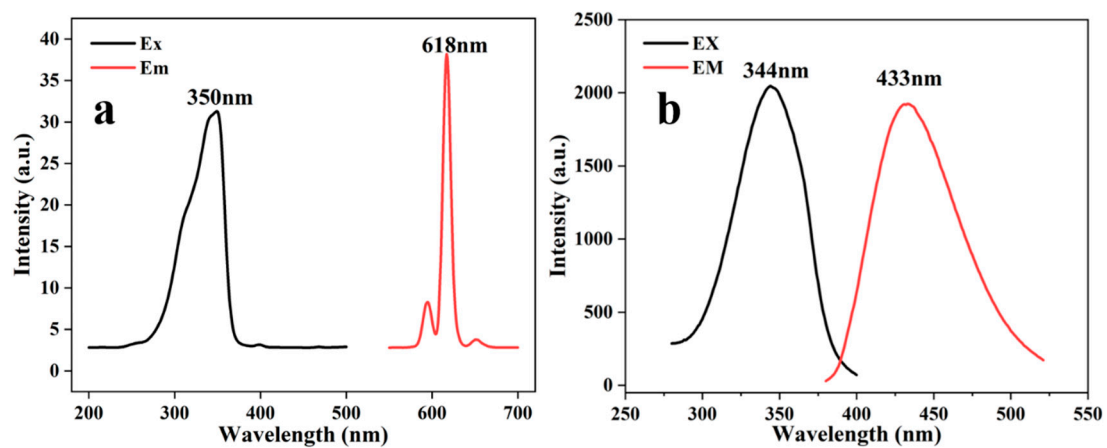

**Figure. S3.** Excitation spectrum and emission spectrum of Eu(MAA)<sub>3</sub>phen (a) and CDs (b).

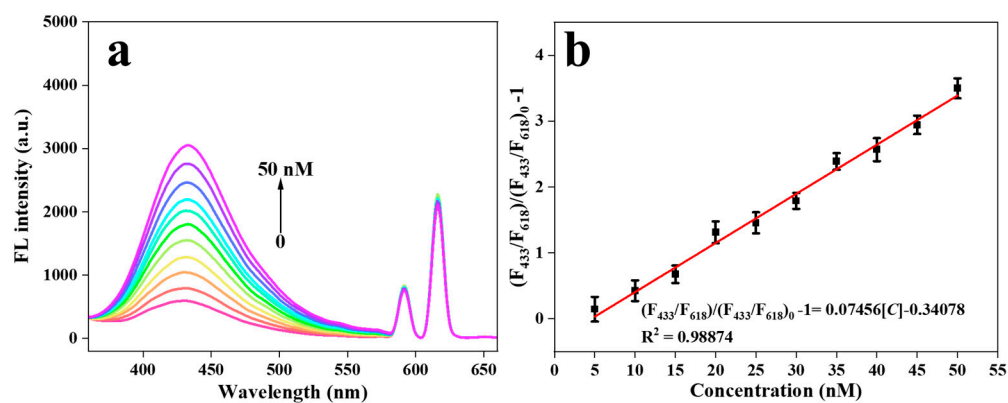

**Figure. S4.** Fluorescence spectra of Eu/CDs-MIPs (a) upon the exposure to different concentration of NOR ranges from 0 nM to 50 nM. Linear relationship of Eu/CDs-MIPs (b) upon the same concentrations range of NOR.

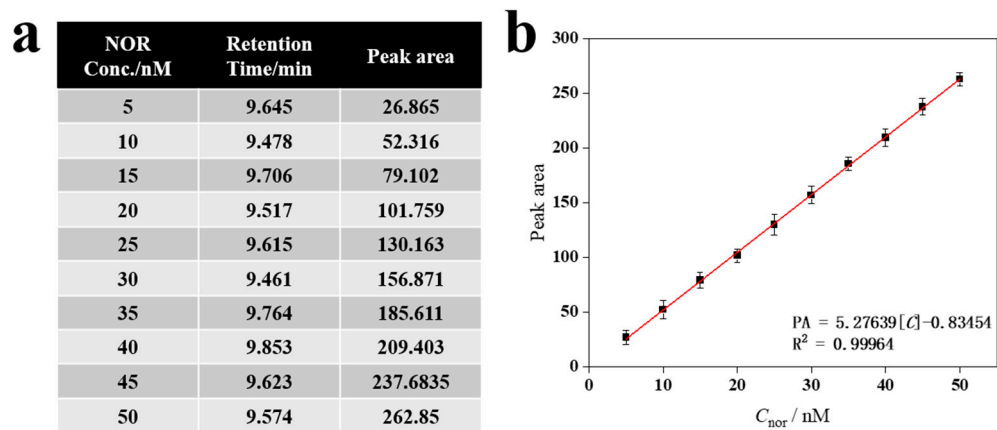

**Figure. S5.** (a) The parameters of HPLC results; (b) linear equation curve for NOR.
